# Supplementary material
Source: HighWire-hosted journal article supplement (https://rmdopen.bmj.com/content/8/1/e002119)
Supplement: inline-supplementary-material-1 [file inline-supplementary-material-1.pdf]

**Supplementary information for the manuscript:****“Sjögren’s and non-Sjögren’s sicca share a similar symptom burden but with a distinct symptom-associated proteomic signature”**

Valentina Pucino<sup>1,2\*</sup>, Jason D. Turner<sup>1\*</sup>, Saba Nayar<sup>1</sup>, Florian Kollert<sup>3</sup>, Saaeha Rauz<sup>1,4</sup>,  
Andrea Richards<sup>5</sup>, Jon Higham<sup>5</sup>, Ana Poveda-Gallego<sup>1,5</sup>, Simon J. Bowman<sup>1,2</sup>, Francesca  
Barone<sup>1,2,6</sup> and Benjamin A. Fisher<sup>1,2</sup>

**Supplementary Table 1 – Associations between proteins and symptoms (ESSPRI).** Values shown are the unstandardized coefficients and 95% confidence intervals.

| Proteins vs ESSPRI | SjS<br>(n = 53)          |         | Sicca<br>(n = 60)     |                   |
|--------------------|--------------------------|---------|-----------------------|-------------------|
|                    | B<br>(95% CI)            | P value | B<br>(95% CI)         | P value           |
| <b>ADM</b>         | 0.15<br>(-1.22 to 1.53)  | 0.83    | 2.2<br>(1.44 to 3)    | <b>&lt;0.0001</b> |
| <b>TNFRSF13B</b>   | -0.3<br>(-1.5 to 0.9)    | 0.60    | 1.9<br>(0.64 to 3.17) | <b>0.004</b>      |
| <b>FGF_23</b>      | 0.7<br>(-0.42 to 1.82)   | 0.21    | 1.9<br>(0.70 to 3.1)  | <b>0.005</b>      |
| <b>CD40</b>        | -0.1<br>(-2.1 to 1.9)    | 0.92    | 2.9<br>(1.5 to 4.4)   | <b>0.0001</b>     |
| <b>IL_10RB</b>     | 0.35<br>(-1.77 to 2.48)  | 0.74    | 3.5<br>(1.6 to 5.4)   | <b>0.001</b>      |
| <b>CD5</b>         | -0.5<br>(-2.65 to 1.64)  | 0.63    | 1.9<br>(0.53 to 3.34) | <b>0.008</b>      |
| <b>CD4</b>         | -1.3<br>(-3.44 to 0.82)  | 0.22    | 2.6<br>(1.2 to 4.04)  | <b>0.001</b>      |
| <b>ACE2</b>        | 0.75<br>(-0.48 to 1.99)  | 0.23    | 1.7<br>(0.88 to 2.47) | <b>&lt;0.0001</b> |
| <b>LEP</b>         | 0.2<br>(-0.64 to 1.04)   | 0.80    | 0.8<br>(0.21 to 1.35) | <b>0.009</b>      |
| <b>TRAIL_R2</b>    | -0.04<br>(-1.60 to 1.52) | 0.75    | 2.1<br>(0.90 to 3.33) | <b>0.001</b>      |

|                  |                          |             |                        |              |
|------------------|--------------------------|-------------|------------------------|--------------|
| <b>SPON2</b>     | -4.3<br>(-8.28 to -0.33) | <b>0.03</b> | 4.3<br>(1.1 to 7.8)    | <b>0.01</b>  |
| <b>PD_L1</b>     | -0.24<br>(-0.42 to 0.19) | 0.42        | 1.35<br>(0.26 to 2.45) | <b>0.02</b>  |
| <b>SLAMF1</b>    | 0.4<br>(-1.15 to 2.01)   | 0.73        | 1.4<br>(0.32 to 2.5)   | <b>0.01</b>  |
| <b>CSF_1</b>     | -0.03<br>(-3 to 2.94)    | 0.98        | 4.4<br>(1.82 to 7.05)  | <b>0.001</b> |
| <b>IL_1ra</b>    | 0.35<br>(-0.73 to 1.43)  | 0.52        | 0.96<br>(0.1 to 1.8)   | <b>0.03</b>  |
| <b>Gal_9</b>     | -0.7<br>(-2.67 to 1.13)  | 0.42        | 2.3<br>(0.82 to 3.86)  | <b>0.003</b> |
| <b>TNFRSF10A</b> | -0.3<br>(-1.97 to 1.35)  | 0.71        | 1.7<br>(0.37 to 3)     | <b>0.01</b>  |
| <b>IL_12B</b>    | -0.02<br>(-0.98 to 0.93) | 0.06        | 0.4<br>(-0.04 to 0.90) | <b>0.07</b>  |
| <b>TNFRSF9</b>   | 0.01<br>(-1.28 to 1.3)   | 0.98        | 1.4<br>(0.39 to 2.43)  | <b>0.008</b> |
| <b>TNFRSF11A</b> | 0.01<br>(-1.51 to 1.69)  | 0.91        | 1.4<br>(0.28 to 2.91)  | <b>0.02</b>  |

**Supplementary Table 2 – Results of multiple regression analysis model (forward) for proteins and symptoms in sicca patients.** Values shown are the unstandardized coefficients and 95% confidence intervals.

| Variables vs ESSPRI | Model (Forward)    |          |
|---------------------|--------------------|----------|
|                     | B (95% CI)         | P value  |
| ADM                 | 2.5<br>(1.6-3.6)   | < 0.0001 |
| CD40                | 2.5<br>(1.1-3.8)   | < 0.0001 |
| SPON2               | -4.6<br>(-8.6-1.2) | 0.009    |

**Supplementary Table 3 - Correlations between ADM and clinical/immunological variables.** Values shown are the unstandardized coefficients and 95% confidence intervals.

| ADM versus clinical parameters | SjS<br>(n = 53)            |              | Sicca<br>(n = 60)          |                   |
|--------------------------------|----------------------------|--------------|----------------------------|-------------------|
|                                | B<br>(95% CI)              | P value      | B<br>(95% CI)              | P value           |
| Age                            | 0.01<br>(0.003 to 0.02)    | <b>0.01</b>  | 0.02<br>(0.01 to 0.03)     | <b>0.001</b>      |
| BMI                            | 0.03<br>(0.01 to 0.05)     | <b>0.01</b>  | 0.04<br>(0.02 to 0.07)     | <b>0.001</b>      |
| Weight                         | 0.01<br>(0.0001 to 0.01)   | <b>0.04</b>  | 0.01<br>(0.003 to 0.20)    | <b>0.01</b>       |
| Fat mass                       | -0.005<br>(-0.003 to 0.01) | 0.22         | 0.004<br>(-0.003 to 0.01)  | 0.25              |
| Free fat mass                  | 0.003<br>(-0.01 to 0.02)   | 0.62         | 0.02<br>(-0.003 to 0.36)   | 0.09              |
| Leptin                         | 0.2<br>(0.1 to 0.36)       | <b>0.004</b> | 0.3<br>(0.15 to 0.41)      | <b>&lt;0.0001</b> |
| VAS global<br>(patient)        | -0.003<br>(-0.01 to 0.005) | 0.43         | -0.01<br>(-0.02 to -0.002) | <b>0.008</b>      |
| EQ5D                           | 0.10<br>(-0.35 to 0.55)    | 0.65         | -0.7<br>(-1.16 to -0.28)   | <b>0.002</b>      |
| IgG                            | -0.004<br>(-0.21 to 0.13)  | 0.66         | 0.06<br>(-0.01 to 0.13)    | 0.07              |
| C3                             | 0.7<br>(0.19 to 1.23)      | <b>0.008</b> | 0.6<br>(0.06 to 1.13)      | <b>0.03</b>       |

|                                      |                           |      |                           |             |
|--------------------------------------|---------------------------|------|---------------------------|-------------|
| <b>C4</b>                            | 0.7<br>(-0.64 to 1.41)    | 0.45 | 0.6<br>(-0.25 to 2.96)    | 0.1         |
| <b>K/L free light chain quotient</b> | 0.01<br>(-0.12 to 0.14)   | 0.86 | 0.33<br>(0.10 to 0.71)    | <b>0.01</b> |
| <b>Focus score</b>                   | 0.01<br>(-0.14 to 0.17)   | 0.86 | 0.01<br>(-0.47 to 0.48)   | 0.98        |
| <b>Schirmer's test</b>               | -0.01<br>(-0.02 to 0.005) | 0.09 | -0.01<br>(-0.02 to 0.003) | 0.13        |
| <b>Unstimulated salivary flow</b>    | -0.1<br>(-0.35 to 0.09)   | 0.24 | -0.15<br>(-0.27 to -0.02) | <b>0.02</b> |

**Supplementary Table 4 – Multiple regression analysis models for proteins and symptoms in sicca patients.** Values shown are the unstandardized coefficients and 95% confidence intervals.

| Variables vs<br>ESSPRI        | Individual predictors |                    | Model 1<br>(Multiple regression) |                   | Model 2<br>(Forward) |                    |
|-------------------------------|-----------------------|--------------------|----------------------------------|-------------------|----------------------|--------------------|
|                               | $\beta$<br>(95% CI)   | P value            | $\beta$<br>(95% CI)              | P value           | $\beta$<br>(95% CI)  | P value            |
| Age                           | 0.06<br>(0.01-0.1)    | <b>0.02</b>        | -0.01<br>(-0.1-0.1)              | 0.44              | -                    | -                  |
| BMI                           | 0.16<br>(0.06-0.26)   | <b>0.002</b>       | 0.06<br>(-0.1-0.2)               | 0.16              | -                    | -                  |
| HADS D                        | 0.16<br>(0.03-0.3)    | <b>0.01</b>        | 0.1<br>(-0.1-0.3)                | 0.07              | 0.2<br>(0.04-0.3)    | <b>0.008</b>       |
| C3                            | 1.6<br>(-0.9-4.2)     | 0.20               | -0.7<br>(-2.9-5.6)               | 0.42              | -                    | -                  |
| Unstimulated<br>salivary flow | -0.6<br>(-1.1—0.1)    | <b>0.02</b>        | -0.12<br>(-1.7-1.8)              | 0.50              | -                    | -                  |
| ADM                           | 2.2<br>(1.4-3)        | <b>&lt; 0.0001</b> | 2.3<br>(1.3-3.5)                 | <b>&lt;0.0001</b> | 2.5<br>(1.5-3.4)     | <b>&lt; 0.0001</b> |
| CD40                          | 2.9<br>(1.5-4.4)      | <b>&lt; 0.0001</b> | 2.5<br>(1.2-3.8)                 | <b>0.001</b>      | 2.5<br>(1.2-3.8)     | <b>&lt; 0.0001</b> |
| SPON2                         | 4.3<br>(1.1-7.7)      | 0.01               | -4.5<br>(-8--1.3)                | <b>0.01</b>       | -4.6<br>(-8.6-1.2)   | <b>0.009</b>       |
